# Supplementary material
Source: MDPI journal article supplement (https://www.mdpi.com/2311-7524/9/11/1238)
Supplement: s1 [file s1]

>PcTYR

attgttgatgatcgccgacagccagacaagccccgggggctggttaacattgtggacgcacagttgatcttctctccttgtaatcctggtcctcgatcgccggcgatgta  
gaggctggcggttatcggggaagataagtcgctctttttgaggtattgtcgcgcgcgaggaggacgggtgtagcatggactcgtagaggaggaagtagccca  
tccactctgagatgatgatgtcgaattcttgatggggagttcgatgtcttcgagcttgcccttgacgagtggtattgctgatcgcatcacatagcgggtaaggaga  
caagccgatagagcgggtacacgagagacgctcactgtagcgaatccattggccgcaatgatgttctgcgcttgatcgatgatgttgacatgtcaaccttcattg  
agatagttgtcaagatgccccagactggagacggtagcactcacaccgacaacgtgcttgcgccagcctttgcagcaaacatgctcagtatgccggttcgcgcatc  
caacgtccagcactgttttcccttgaaaagggtggggattgttgatgatcgacgttctatacgatccagttcggacagagtccttgagcatctcctcggtgatccctgc  
gcattgtattagccatcagagagagatccgctatccaagccgaataacgaacaaaaatgcgcgtaagaatctgcataacttttctagatttcagagaattgtcacgtt  
caagcgaacaagtagcgaactagtcgagagaggtcatgtcatgcgcgcgctggttgcgtgattcgtagatggtcctcgctcggacattgtggaatacttagaccg  
ttgaattcgatggatggatgggtgatggtacgagcgagaggaacacaactgaaggtt<sup>c</sup>gaaaaaagcagaaccctaatacgggacagagattgcttacgtagac  
aagggtccgattaccacgagcgacgcaccgtagcgtagcggtacggctgttatccgcagctaaccaaagtcagcgacagctaccacagtgaccgaccggttccataaa  
acctgtcaaatgatcattattccccaaaacgatatggtacgttccccatccctggtcgttcaagatcgctgctgacctcggactgattcaggcatctaaccactgaac  
gctccgactgctaaccacactcttgccacatttcttgattcccctcctccatacgacccccaaagatgggagaacgactgggtgagctcctgttgccttttgctgagggga  
tgctcattgagatcacagctgacaacagcaagaacacagaccaggttaggtcgccgagtcgagtcgcaaccgcaaccgcaaccgcaaccgcaacctcagcca  
ttgcagccgatgttggctgacctgagcattcctgtatcgatggtgcggtgatgtaccggggcgccccagttcaccagtatcgtggaccaatggggagattct  
ttatgggtcctaccgcctaatacaccggaaatgatatgtttgcagcagggacatgacgagaaaacacattacggagtagtgggtgcgttcatcttttgggttgccc  
aactaaaattgaatcccttcataggccttctgctgccgtcttctggtttcccttggggattgggtctgtatgctcgacagcaaggtgaagtgaacgggtgccaca  
aagtcattgacgaaggcatttgggtagttgccttcatacgccatttcttctgttgactgccaactcgtctcccttactacatgtatattagtcttactgtcacccat  
ccttccgtacttccatcacaatacgataatggagttcaattatcagaagaatcgggtgcaccacactacttcttcttataagatgtagagctgcgattcgagtcctgg  
gcttctgagttccacagcccaccctaaccaagcgccgattgacttcaacaccggcatctcagtgctagcactcgatcgggtgacattgcttcaagggtggtggcg  
acttttctaccctggcgaaacttcttattattacagtgtttctcgggcgattgattgcgtcgcgtgtggtccgcgaccgccgctgcagagtttatcgcttcttcaac  
ttcatcgcttatagcttccgaatccttcaaacgctcataatccgctgtcgtggacctgtctgtcgtttagccttccatcgagccgctctacgggtctggtctggaatt  
tgctgcatctcgagggtgccttgcgtgacctgaaaaagccgtcaataatcctatacgggagggcttctggcgctcaggtattaaagcagtgaaatcggaaccccgca  
caaaggtcgccaaaggactccattcgtgacgcacgactaggcgactacttgacgcgacggagcagcaagagcagcagcgccaggccctcttcttctcccaact  
gggcaagcggttcgaattcaaATGCACTTCCCGCGGTTCCAGGCTATTCTCTCCATCATATGCACGATGTTCCAAGGACCAC  
AGCTGGTGCCAGGGACCCTCTCCGAAGTTCGGCCCAATACGACGACGACGCGGTGTGTTTCCCCGACGGTCAG  
AAAGGAATGGCGTTCGCTCACGAAGTTGGAACGGACCGACTGGATCACGGCCGTCGAGTGTCTGCATAGTTTG  
CCTCACGATGATAGCTACGTGCCCCCTCGAAGGACGCACCAATACACACCACCGTTAAACACGTCGAGTTCGTA  
TTATGATGgtataaagcttcgattttccatggcggttgattgttggttaaacacgacctgtagACCTGGTATATTTTCATGTAAATAACGACAATTAT  
GcaagtcceatttctcctatcgcttgaacgcgacgctgacgattcatctaaccctctaggTTCATCTTACGGCCCTATTCTTTCCATGGCACCGCT  
GGCTCTTGACAAACGTGCAACTCGCCCTCAAGAATAAATGCAGCTACGACGGCCCAACACCGTACTGGGACTG  
GATTCAAGgtaaaaatttctgcttggcggttacgctcgcgatcatcgagccgctctgagtatatcctgagtatatcataatgctgataatacaaacacatacttagACTCCCT  
GGACTTCCACGGGTTCGACCATGTTTCAGGATCCCGACCCGCAATCGGGGCTGGGAGGCTGGGGCATCTCTGCC  
GCGGACGACTACACCGTTACCGACGGCGCATTTGGCGAGGACGCGTCGTTTCGTCATGGCGTACCCCGTACCGC  
ATAGCATCCGCCGCCATTTGACTTGTACCCATACCTGAAGTCTCTGCAGCCCCGATCTCATCCCGAATCCGAGCT  
TGCCAGGGAATGTGAGCATCACGCCAAGTTTAATTCGCGGTATGATCAATGGACATGTGGGTGATTTCAGGGG  
TTTCAGGCTGCGTTTGAGGGGTTTCAGGtaaagaagcttcaaacccgctctacatatataaagttaactctgacgaa<sup>t</sup>ggattgcaggGCCCGCAT  
TCGGCCGTGCATTTGATGGTCGGCGGtaagtcgggttctcagtcacggattgatacattgatactgaattgacattcaacgCGATCTTGCTGG  
AACGTGTCCTCCCAACGCACCAGAGGAATGCAAAGACGGCTCAAAGTGGGCTCCTAACGATCCTCTATTCTGG  
ATGCACCACGCTgtaagccttcccgtcctcttctgttgatcaacaacatcaactacatatatta<sup>a</sup>atgtcgttt<sup>g</sup>atagATGATCGACAAAGTCTGGTCT  
GAATGGCAGAGCAAGCACGAGGCGAACTTCATGTCCTTCGAAGGCGGCTCCGTCCAGCGTTTCGAGAACATTA  
CGATACATGAACGATACCCTAATGGAGGCCCCGCCATTTCTCCACgttagtctctcacaggaaacgggtaccagagtctcgtgacttccaacctt  
gacctttagattctcggtgttccagCTAGATTCTGCGCTGAGTGGACACGGACTCTTCCCCGATGGGGTGATCGCCGATGTTATG  
AATACGACTGGCGGATATCTTTGCTACGTATACGAGTAA

Note: The upper case letters represent the exons and the lower case letters represent the introns. The grey shading represents the promoter region. The red letters represent the mutation sites. The superscript character represents the base in the white strain.

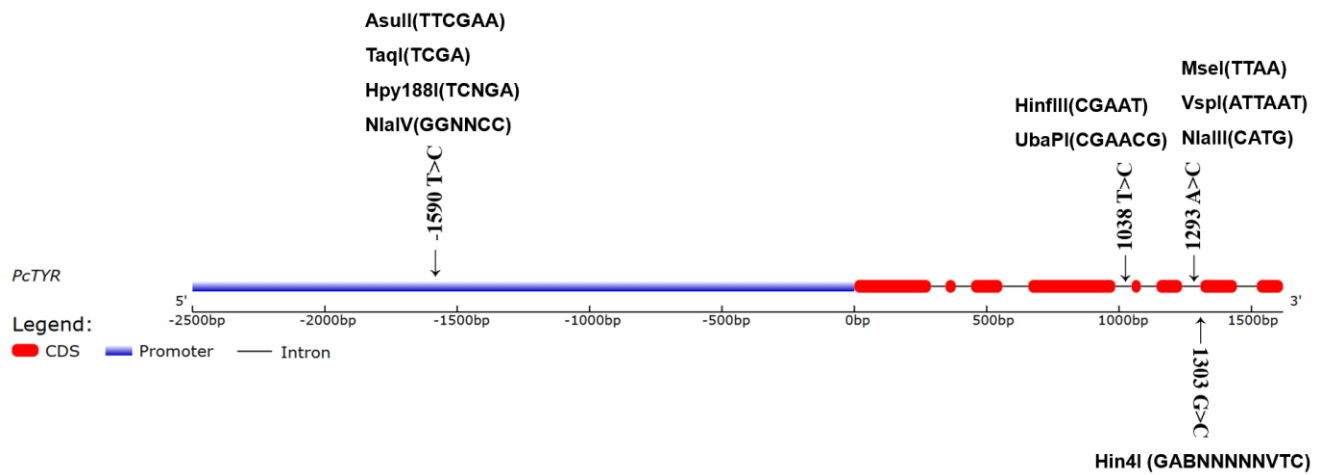

**Figure S1.** Four SNPs in white and non-white strains and the cleavage sites present at each SNP. What we chose in the experiment was the common, cheap, and easy to operate marker development. dCAPS labeling development requires the introduction of one or two mismatched bases, and the restriction sites can be modified and selected in the dCAPS Finder 2.0 website.
